# Supplementary material for: Biocatalytic green approach for epoxidation of fatty compounds derived from soyadeodistillate under acid free conditions
Source: Royal Society of Chemistry journal article supplement (doi:10.1039/c5ra08582a), 2015-01-01

## **Supporting Information**

### **Biocatalytic green approach for epoxidation of fatty compounds derived from soyadeodistillate under acid free conditions**

Sunil Kumar Suman,<sup>1a</sup> Manisha Dhawaria,<sup>1a</sup> Jyoti Porwal,<sup>1a</sup> Mounika Aila,<sup>1a</sup> Neha Karanwal,<sup>1a</sup> Babita Behra,<sup>1b</sup> Savita Kaul,<sup>1a</sup> Sanjay Ghosh<sup>2</sup> and Suman L. Jain<sup>1c\*</sup>

<sup>1a</sup>Biofuel Division, CSIR-Indian Institute of Petroleum, Dehradun-248005 (India)

<sup>1b</sup>Analytical Sciences Division, CSIR-Indian Institute of Petroleum, Dehradun-248005 (India)

<sup>1c</sup>Chemical Sciences Division, CSIR-Indian Institute of Petroleum, Dehradun-248005 (India); Tel. 91-135-2525788; \*Email: [suman@iip.res.in](mailto:suman@iip.res.in)

<sup>2</sup>Department of Biotechnology, Indian Institute of Technology Roorkee-247667, India

Fig. S 1. FTIR spectra of: A) Linoleic acid; B) Epoxide of Linoleic acid

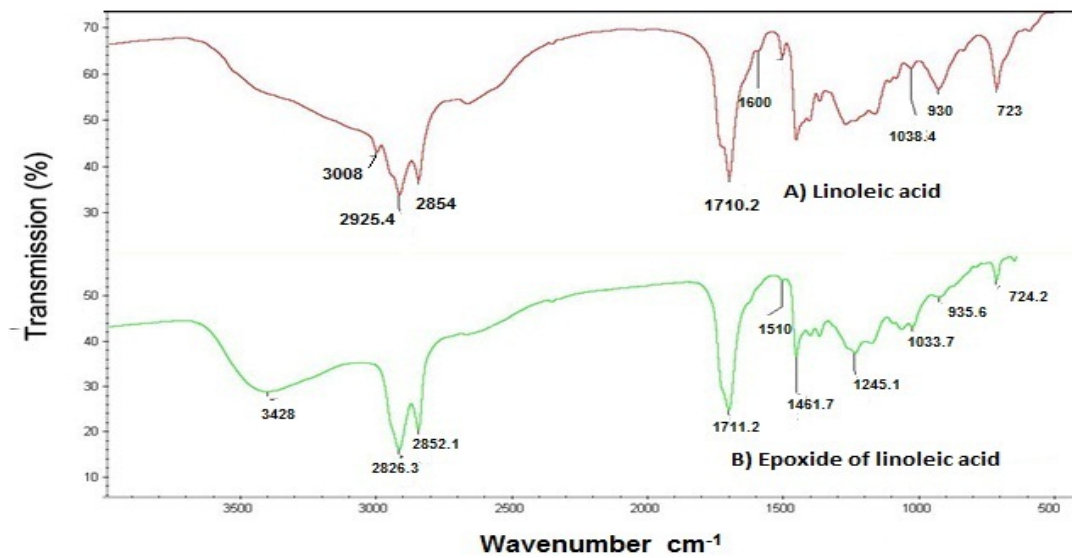

**Fig. S 2.  $^1\text{H}$  NMR of (A) linoleic acid, (B) epoxide of linoleic acid**

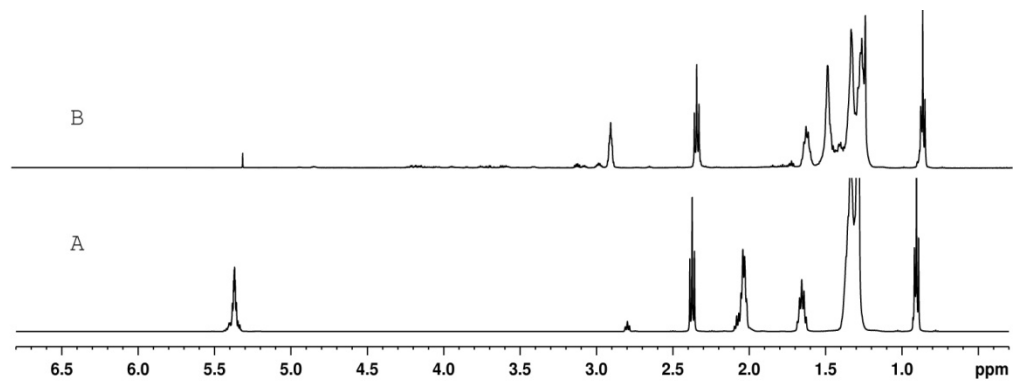

**Fig. S 3. <sup>1</sup>H NMR of (A) soyadeodistillate, (B) epoxide of soyadeodistillate, (C) Ester of soyadeodistillate [(9Z,12Z)-2-ethylhexyl octadeca-9,12-dienoate], (D) Epoxide of ester of soyadeodistillate [(9Z,12Z)-2-ethylhexyl octadeca-9,12-dienoate]**

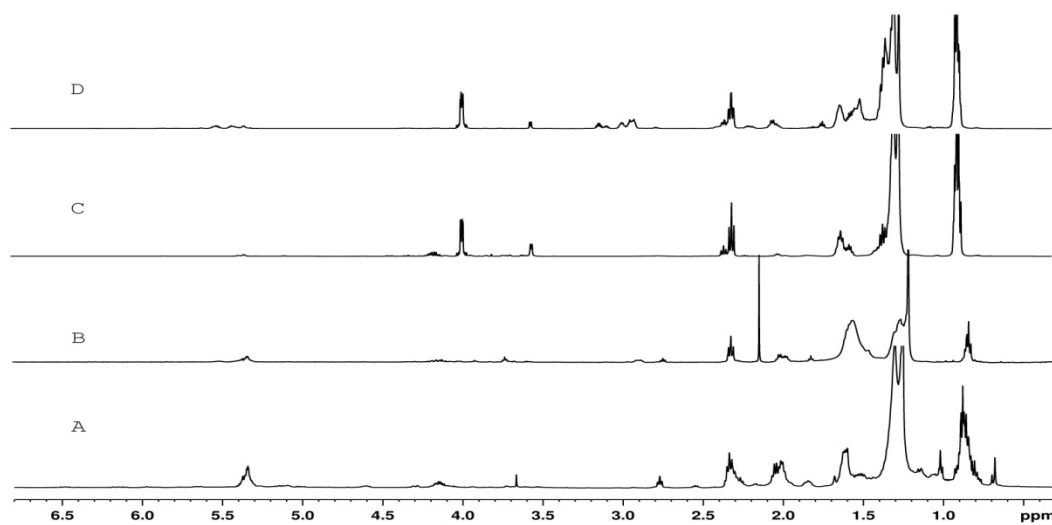

Supplement: c5ra08582a1.pdf [file c5ra08582a1.pdf]
